# Supplementary material for: Initial growth and root system development of Cryptomeria japonica cuttings using different nursery methods
Source: Research Square preprint supplement (doi:10.21203/rs.3.rs-7637088/v1), 2025-11-06
Supplement: Supplementary file 1 [file 455b8d185019b52c9192e9c8.docx]

Initial growth and root system development of *Cryptomeria japonica* cuttings using different nursery methods

Journal name: New Forests

Tomoya Yoshimura1 ・Shinichi Kakuta2 ・Atsushi Watanabe*,3

1Graduate School of Bioresource and Bioenvironmental Sciences, Kyushu University, Fukuoka, Japan

2Tsukuba Research Institute, Sumitomo Forestry Co. Ltd., Tsukuba, Japan

3 Faculty of Agriculture, Kyushu University, Fukuoka, Japan

Atsushi Watanabe: nabeatsu@agr.kyushu-u.ac.jp

**Supplementary Material**

Fig. S1 Overview of pull-out test

(a)conceptual diagram

(b)The actual examination

(c)The result of pull-out test

Fig. S2 Relationships between root volume and maximum pull out resistance at each growth season among the cutting varieties

Fig. S3 The Photos of the root at the second growth season and the fourth growth season (after the end of the research) in biodegradable

Fig. S4

Comparison between dig-out test and pull-out test in 1st growth season and 2nd growth season

(a)belowground dry weight

(b)number of primary root

The asterisk indicates significant differences according to T test at the 5% error probability (p < 0.05).

n.s. indicates no significant differences according to t-test at the 5% error probability

Table S2. Root bound index (RBI)

|  | Average root-collar diameter (mm) | Cell diamerer (mm) | Root bound index (%) |
| --- | --- | --- | --- |
| BCC | 6.2 | 42.5 | 15 |
| biodegradable | 5.8 | 52 | 11 |
| JFA 150 | 6.1 | 45 | 14 |
